# Supplementary material for: Kefir Culture-Mediated Fermentation to Improve Phenolic-Linked Antioxidant, Anti-Hyperglycemic and Human Gut Health Benefits in Sprouted Food Barley
Source: MDPI journal article supplement (doi:10.3390/applmicrobiol1020026), 2021-09-17
Supplement: s1 [file s1]

Archive with 1 entries (1 files):
- applmicrobiol-1360846-supplementary.pdf
